# Supplementary material for: A Bayesian inference method for the analysis of transcriptional regulatory networks in metagenomic data
Source: PubMed Central journal article supplement (PMC4938975; doi:10.1186/s13015-016-0082-8), 2016-07-08
Supplement: 13015_2016_82_MOESM3_ESM.pdf [file 13015_2016_82_MOESM3_ESM.pdf]

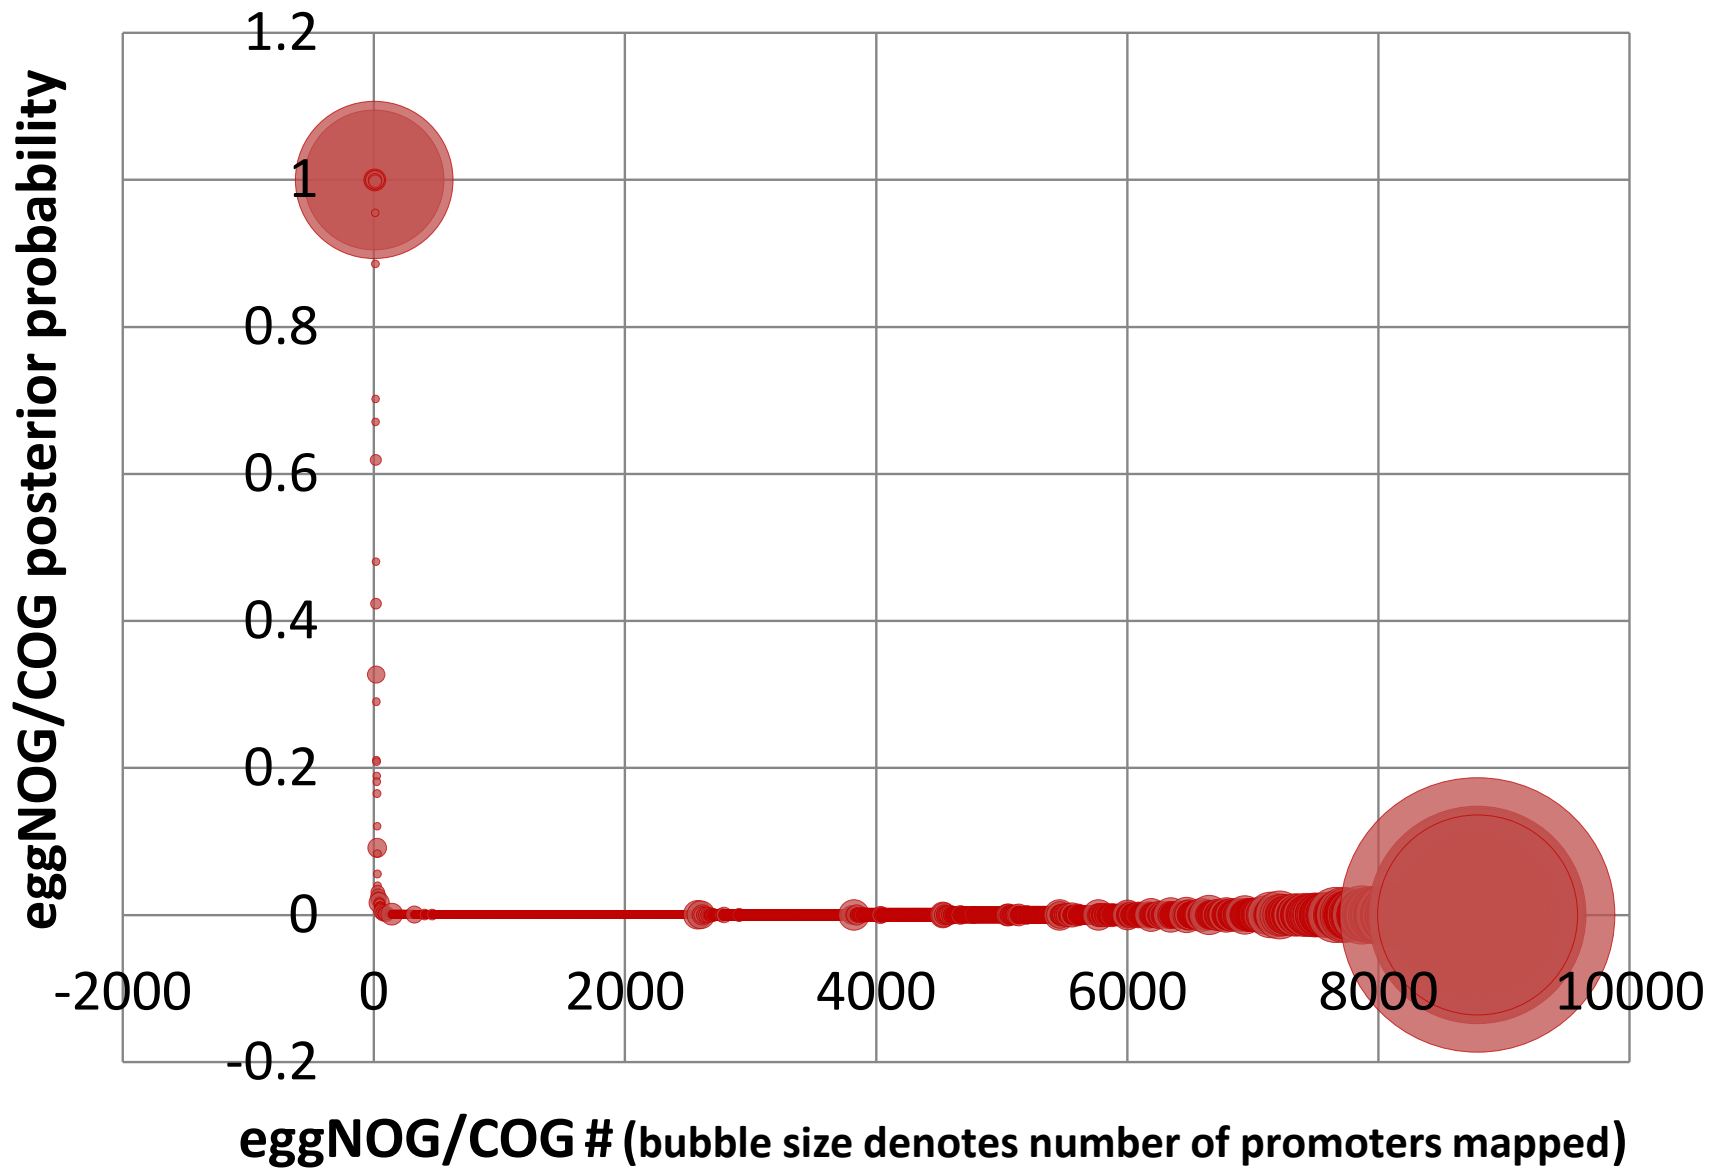

**Supplementary file 3** – Distribution of eggNOG/COG posterior probabilities as a function of the number of promoter sequences mapping to the eggNOG/COG after adjusting for sensitivity with  $\vartheta=6.65$ . The x-axis indicates eggNOG/COG rank number, sorted by decreasing posterior probability. Bubble size indicates the number of promoters mapping to a given eggNOG/COG.
