# Supplementary material for: A Bayesian inference method for the analysis of transcriptional regulatory networks in metagenomic data
Source: PubMed Central journal article supplement (PMC4938975; doi:10.1186/s13015-016-0082-8), 2016-07-08
Supplement: 13015_2016_82_MOESM4_ESM.pdf [file 13015_2016_82_MOESM4_ESM.pdf]

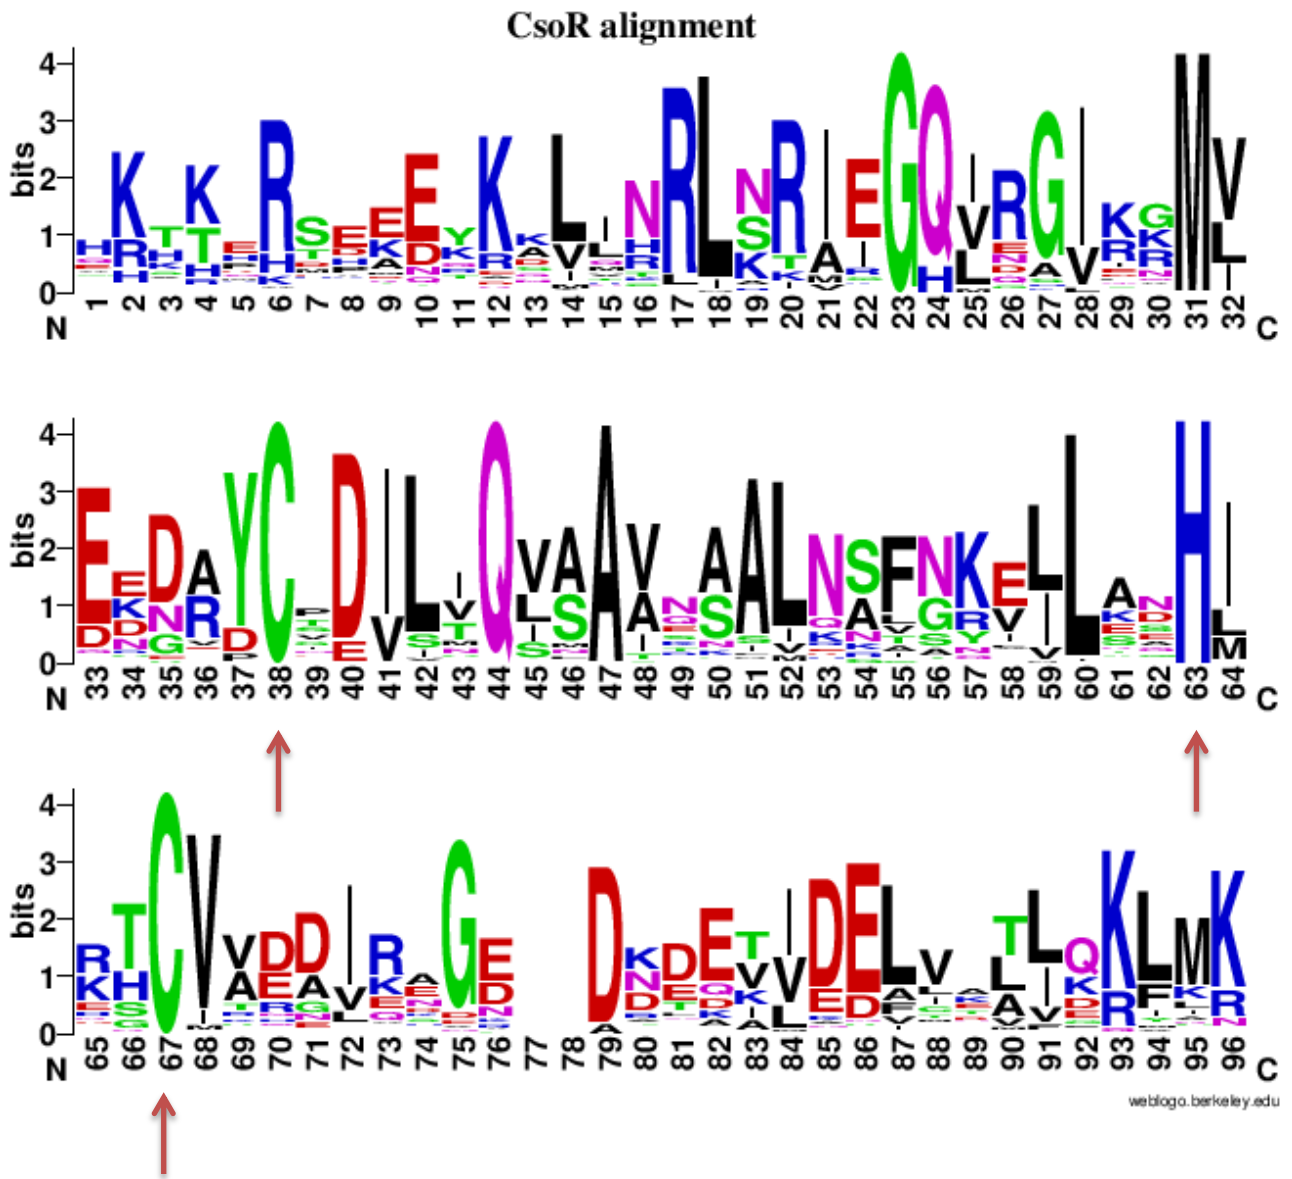

**Supplementary file 4** – Sequence logo summarizing the multiple sequence alignment of putatively regulated protein sequences mapping to COG1937. Alignment was performed with CLUSTALW in profile alignment mode, using the structural information in the *M. tuberculosis* CsoR P9WP49 UniProtKB entry to define gap penalties. The C-H-C motif residues are denoted by red arrows.
