# Supplementary material for: A Bayesian inference method for the analysis of transcriptional regulatory networks in metagenomic data
Source: PubMed Central journal article supplement (PMC4938975; doi:10.1186/s13015-016-0082-8), 2016-07-08
Supplement: 13015_2016_82_MOESM6_ESM.pdf [file 13015_2016_82_MOESM6_ESM.pdf]

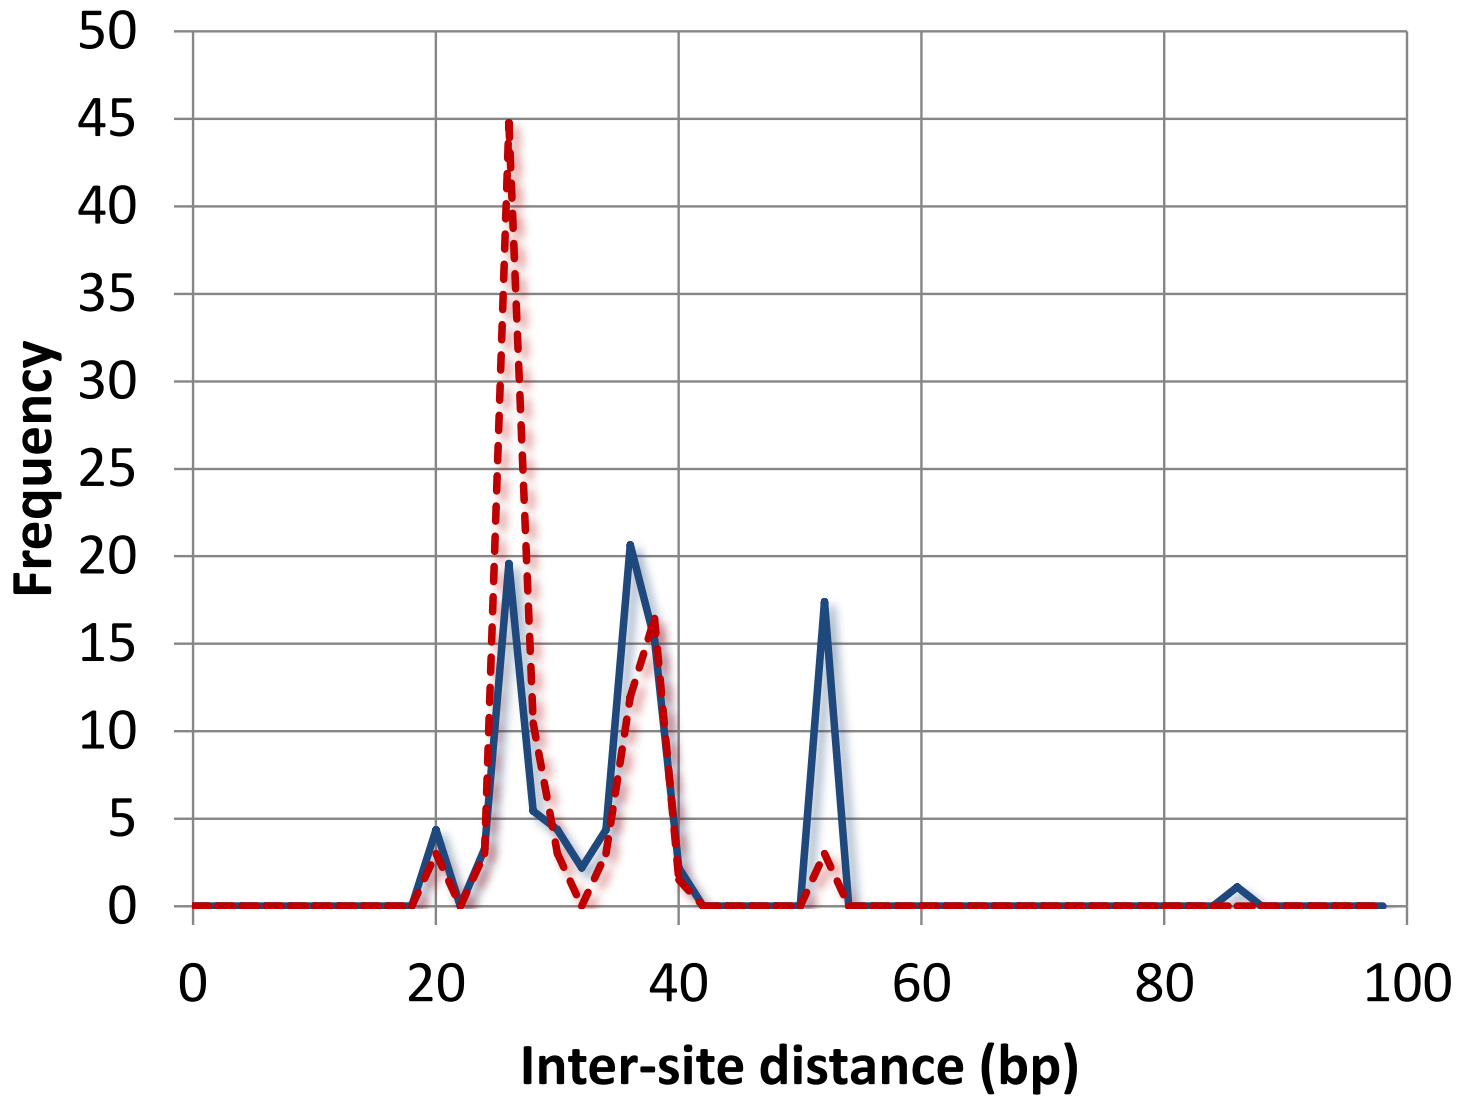

**Supplementary file 6** – Distribution of distance between high-confidence sites (bp) for promoters with more than one high-confidence site.
